# Supplementary material for: Association between preterm births and socioeconomic development: analysis of national data
Source: Springer Nature journal article supplement (doi:10.1186/s12889-022-14376-2), 2022-11-03

# Percentage of preterm births

Heatmap of preterm births rates from 2014 to 2019 per Federal Unit of Brazil.

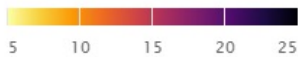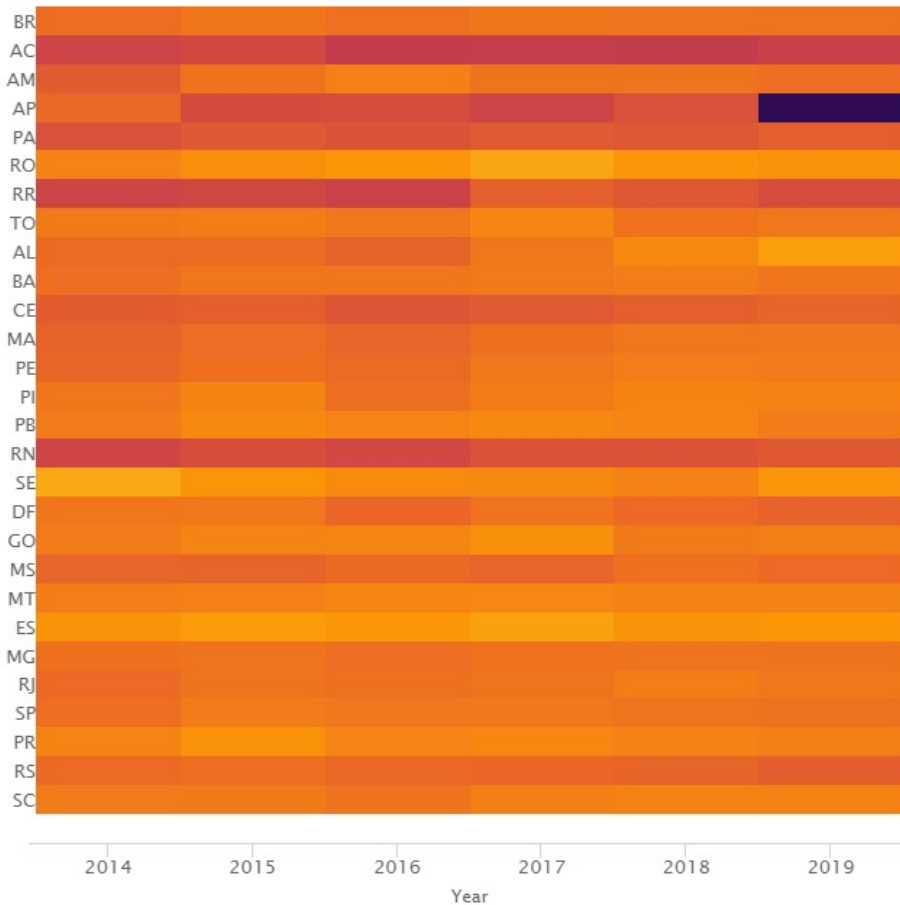

Supplement: MOESM1 [file 23671584]
