# Supplementary material for: Association between preterm births and socioeconomic development: analysis of national data
Source: Springer Nature journal article supplement (doi:10.1186/s12889-022-14376-2), 2022-11-03
Supplement: MOESM2 [file 23671584]

Table of spontaneous preterm births per Federal Unit of Brazil

| FU | <i>Total births</i> | <i>PB</i>         | <i>Spontaneous PB</i> |
|----|---------------------|-------------------|-----------------------|
| DF | 42422               | 5055<br>(11.92%)  | 2596 (6.12%)          |
| SP | 583191              | 65403<br>(11.21%) | 31291 (5.37%)         |
| SC | 98032               | 10213<br>(10.42%) | 5096 (5.20%)          |
| RJ | 207989              | 22510<br>(10.82%) | 11524 (5.54%)         |
| PR | 153469              | 16193<br>(10.55%) | 7791 (5.08%)          |
| MG | 256892              | 28259<br>(11.00%) | 14504 (5.65%)         |
| RS | 134596              | 16425<br>(12.20%) | 6731 (5.00%)          |
| MT | 58852               | 6115<br>(10.39%)  | 3562 (6.05%)          |
| ES | 54925               | 5199<br>(9.47%)   | 2910 (5.30%)          |
| MS | 43695               | 5087<br>(11.64%)  | 3638 (8.33%)          |
| RR | 14620               | 1953<br>(13.36%)  | 1202 (8.22%)          |
| TO | 24449               | 2642<br>(10.81%)  | 1608 (6.58%)          |
| AP | 15356               | 3283<br>(21.38%)  | 826 (5.38%)           |
| CE | 129185              | 14872<br>(11.51%) | 10480 (8.11%)         |
| AM | 77622               | 8832<br>(11.38%)  | 7558 (9.74%)          |
| RN | 44031               | 5434<br>(12.34%)  | 3136 (7.12%)          |
| PE | 133359              | 14049<br>(10.53%) | 9338 (7.00%)          |
| RO | 27028               | 2500<br>(9.25%)   | 1639 (6.06%)          |
| PB | 57701               | 6143<br>(10.65%)  | 5116 (8.87%)          |
| AC | 16280               | 2221<br>(13.64%)  | 1543 (9.48%)          |
| BA | 197249              | 21025<br>(10.66%) | 13443 (6.82%)         |
| SE | 32697               | 3101<br>(9.48%)   | 1373 (4.20%)          |

|       |         |                    |                |
|-------|---------|--------------------|----------------|
| PA    | 138341  | 16247<br>(11.74%)  | 12101 (8.75%)  |
| PI    | 47933   | 4915<br>(10.25%)   | 4247 (8.86%)   |
| MA    | 113317  | 11991<br>(10.58%)  | 8955 (7.90%)   |
| AL    | 49803   | 4495<br>(9.03%)    | 3598 (7.22%)   |
| Total | 2849146 | 314348<br>(11.03%) | 182343 (6.40%) |
