# Supplementary material for: Association between preterm births and socioeconomic development: analysis of national data
Source: Springer Nature journal article supplement (doi:10.1186/s12889-022-14376-2), 2022-11-03
Supplement: MOESM3 [file 23671584]

Table of elective preterm births per Federal Unit of Brazil.

| FU | Total births | PB                | Elective PB      |
|----|--------------|-------------------|------------------|
| DF | 42422        | 5055<br>(11.92%)  | 2459<br>(5.80%)  |
| SP | 583191       | 65403<br>(11.21%) | 34112<br>(5.85%) |
| SC | 98032        | 10213<br>(10.42%) | 5117<br>(5.22%)  |
| RJ | 207989       | 22510<br>(10.82%) | 10986<br>(5.28%) |
| PR | 153469       | 16193<br>(10.55%) | 8402<br>(5.47%)  |
| MG | 256892       | 28259<br>(11.00%) | 13755<br>(5.35%) |
| RS | 134596       | 16425<br>(12.20%) | 9694<br>(7.20%)  |
| MT | 58852        | 6115<br>(10.39%)  | 2553<br>(4.34%)  |
| ES | 54925        | 5199<br>(9.47%)   | 2289<br>(4.17%)  |
| GO | 96112        | 10186<br>(10.60%) | 3649<br>(3.80%)  |
| MS | 43695        | 5087<br>(11.64%)  | 1449<br>(3.32%)  |
| RR | 14620        | 1953<br>(13.36%)  | 751 (5.14%)      |
| TO | 24449        | 2642<br>(10.81%)  | 1034<br>(4.23%)  |
| AP | 15356        | 3283<br>(21.38%)  | 2457<br>(16.00%) |
| CE | 129185       | 14872<br>(11.51%) | 4392<br>(3.40%)  |
| AM | 77622        | 8832<br>(11.38%)  | 1274<br>(1.64%)  |
| RN | 44031        | 5434<br>(12.34%)  | 2298<br>(5.22%)  |
| PE | 133359       | 14049<br>(10.53%) | 4711<br>(3.53%)  |
| RO | 27028        | 2500<br>(9.25%)   | 861 (3.19%)      |
| PB | 57701        | 6143<br>(10.65%)  | 1027<br>(1.78%)  |
| AC | 16280        | 2221<br>(13.64%)  | 678 (4.16%)      |
| BA | 197249       | 21025<br>(10.66%) | 7582<br>(3.84%)  |
| SE | 32697        | 3101<br>(9.48%)   | 1728<br>(5.28%)  |

|       |         |                    |                   |
|-------|---------|--------------------|-------------------|
| PA    | 138341  | 16247<br>(11.74%)  | 4146<br>(3.00%)   |
| PI    | 47933   | 4915<br>(10.25%)   | 668 (1.39%)       |
| MA    | 113317  | 11991<br>(10.58%)  | 3036<br>(2.68%)   |
| AL    | 49803   | 4495<br>(9.03%)    | 897 (1.80%)       |
| Total | 2849146 | 314348<br>(11.03%) | 132005<br>(4.63%) |
