# Supplementary material for: Association between preterm births and socioeconomic development: analysis of national data
Source: Springer Nature journal article supplement (doi:10.1186/s12889-022-14376-2), 2022-11-03

SPB\_rate

Correlogram of spontaneous fraction of preterm births from 2019.

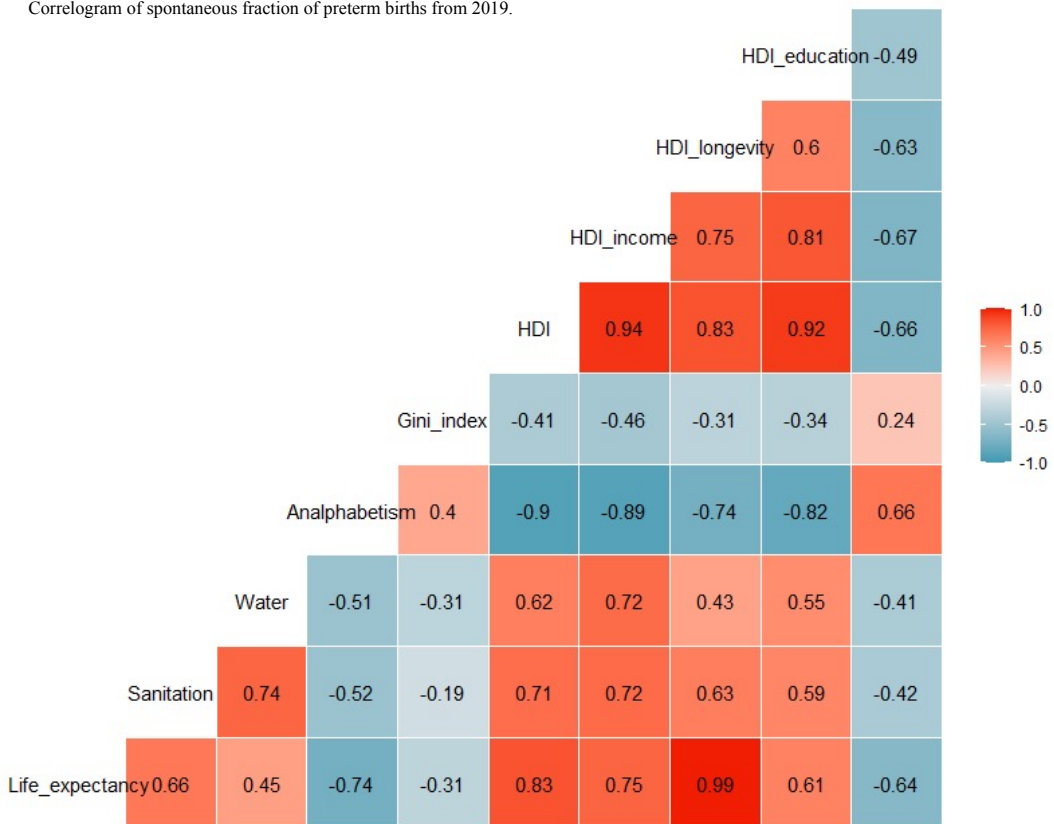

Supplement: MOESM5 [file 23671584]
