# Supplementary material for: Association between preterm births and socioeconomic development: analysis of national data
Source: Springer Nature journal article supplement (doi:10.1186/s12889-022-14376-2), 2022-11-03

Correlogram of elective fraction of preterm births from 2019.

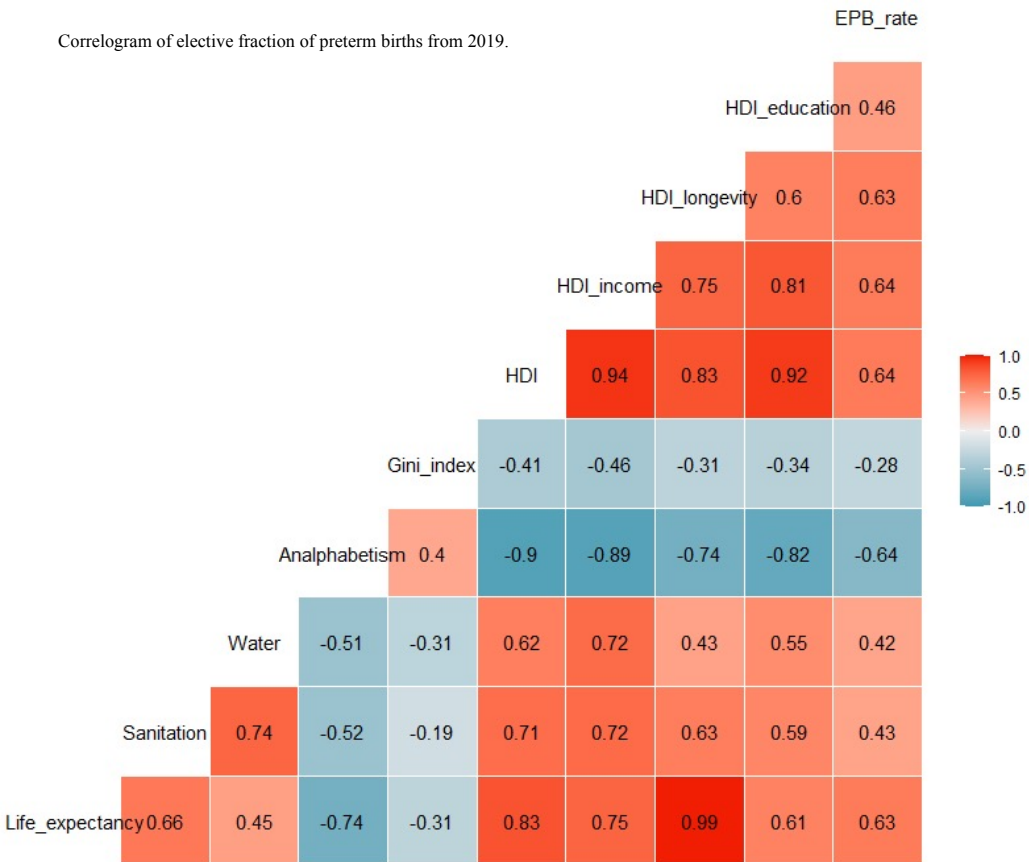

Supplement: MOESM6 [file 23671584]
